1

2

3

4

5 The path to re-evolve cooperation is constrained in *Pseudomonas aeruginosa*

6

7

8

9

10 Elisa T. Granato<sup>1\*</sup>, Rolf Kümmerli<sup>1\*</sup>

11

12 <sup>1</sup>Department of Plant and Microbial Biology, University of Zurich, Zurich, Switzerland.

13

14 \*Correspondence to: Elisa T. Granato, [egranato@botinst.uzh.ch](mailto:egranato@botinst.uzh.ch)

15

Rolf Kümmerli, [rolf.kuemmerli@uzh.ch](mailto:rolf.kuemmerli@uzh.ch)

16 **ABSTRACT**

17

18 **Background.** A common form of cooperation in bacteria is based on the secretion of beneficial  
19 metabolites, shareable as public good among cells at the group level. Because cooperation  
20 can be exploited by “cheat” mutants, which contribute less or nothing to the public good,  
21 there has been great interest in understanding the conditions required for cooperation to  
22 remain evolutionarily stable. In contrast, much less is known about whether cheats, once fixed  
23 in the population, are able to revert back to cooperation when conditions change. Here, we  
24 tackle this question by subjecting experimentally evolved cheats of *Pseudomonas aeruginosa*,  
25 partly deficient for the production of the iron-scavenging public good pyoverdine, to  
26 conditions previously shown to favor cooperation.

27 **Results.** Following approximately 200 generations of experimental evolution, we screened  
28 720 evolved clones for changes in their pyoverdine production levels. We found no evidence  
29 for the re-evolution of full cooperation, even in environments with increased spatial structure,  
30 and reduced costs of cooperation – two conditions that have previously been shown to  
31 maintain cooperation. In contrast, we observed selection for complete abolishment of  
32 pyoverdine production. The patterns of complete trait degradation were likely driven by  
33 “cheating on cheats” in unstructured, iron-limited environments where pyoverdine is  
34 important for growth, and selection against a maladaptive trait in iron-rich environments  
35 where pyoverdine is superfluous.

36 **Conclusions.** Our study shows that the path to re-evolve cooperation seems constrained. One  
37 reason might be that the number of mutational targets potentially leading to reversion is  
38 limited. Alternatively, it could be that the selective conditions required for revertants to  
39 spread from rare are much more stringent than those needed to maintain cooperation.

40

41 **Keywords:** cooperation, siderophores, cheating, iron, *Pseudomonas*, *pvdS*

## 42 BACKGROUND

43 Bacterial life predominantly takes place in diverse communities, where individual cells are  
44 constantly surrounded by neighbors. While high cell density and diversity can create strong  
45 competition in the struggle for nutrients and space [1,2], it can also promote stable networks  
46 of cooperation [3,4]. A common way for bacteria to cooperate is through the secretion of  
47 nutrient-scavenging metabolites, which are shared as “public goods” in the community. Public  
48 goods cooperation is thought to increase nutrient uptake rate, and results in the costs and  
49 benefits of public goods being shared among producer cells. Although beneficial for the  
50 collective as a whole, public goods cooperation can select for “social cheats”: mutants that  
51 lower or abolish their investment into public good production, but still reap the benefits of  
52 nutrient uptake [5,6].

53

54 The undermining of public goods cooperation by cheats has spurred an entire field of research,  
55 examining the conditions required for cooperation to be maintained in the population. In  
56 contrast, the question of how public goods cooperation evolves in the first place has received  
57 much less attention. The main question is: will the conditions that have been shown to  
58 maintain cooperation also promote the evolution of cooperation? Here, we tackle this  
59 question by examining whether bacteria that have evolved low levels of cooperation in a  
60 previous experiment can evolve back to normal levels of cooperation under conditions that  
61 are known to be favorable for cooperation. We use pyoverdine, an iron-scavenging  
62 siderophore secreted by the opportunistic pathogen *Pseudomonas aeruginosa*, as our model  
63 cooperative trait. Pyoverdine is the main siderophore of *P. aeruginosa*, and is secreted into  
64 the environment in response to iron limitation. Pyoverdine acts as a shareable public good  
65 that can be exploited by non-producing cheats that possess the matching receptor for uptake  
66 [7,8].

67

68 We consider three factors that could determine whether cooperation can re-evolve or not.

69 The first factor is the spatial structure of the environment. Previous work revealed that

70 increased spatial structure maintains cooperation because it reduces pyoverdine diffusion and

71 cell dispersal. In other words, spatial structure ensures that pyoverdine sharing occurs

72 predominantly among producer cells [9,10]. The second factor involves the relative costs and

73 benefits of pyoverdine production [8,11]. In the absence of significant spatial structure, it was

74 shown that cheats enjoyed highest relative fitness advantages under severe iron limitation

75 when pyoverdine is expressed at high levels (i.e. high costs). Conversely, cooperation was

76 maintained at intermediate iron limitation when pyoverdine is still important for growth, yet

77 its investment is reduced (i.e. lower costs). Finally, we examine whether the genetic

78 background of cheats is an important determinant of whether cooperation can re-evolve.

79 Previous studies [7,12; Granato ET, Ziegenhain C & Kümmerli R, unpublished] observed the

80 evolution of two types of cheats with greatly decreased pyoverdine production. The first type

81 of cheat has a point mutation in *pvdS*, the gene encoding the sigma factor regulating

82 pyoverdine production [13], whereas the second type of cheat has a point mutation in the

83 promoter region of *pvdS*. While the two types of mutations might differ in their likelihood to

84 revert back to cooperation, both could principally do so, because their pyoverdine

85 biosynthesis cluster is intact [14], and a single point mutation in regulatory elements could

86 lead to reversion.

87

88 We conducted experimental evolution in replicated populations with the two types of

89 pyoverdine deficient strains across three levels of iron limitations and two habitats, differing

90 in their level of spatial structuring. Based on social evolution theory, we predict the reversion

91 to full cooperation whenever Hamilton's rule [15] –  $rB > C$  – is satisfied. While  $r$  is the

92 relatedness between the actor and the recipient,  $C$  is the cost to the actor performing  
93 cooperation, and  $B$  is the benefit gained by the individual receiving cooperation. In our  
94 treatments, we vary  $r$  by manipulating the degree of spatial structure and  $C/B$  by manipulating  
95 the level of iron limitation. Accordingly, we predict that increased spatial structure and/or  
96 moderate investments into pyoverdine production should be most conducive for the re-  
97 evolution of cooperation. Moreover, we also envisage the possibility of pyoverdine production  
98 to degrade even further. This seems plausible because the mutated clones still produce some  
99 pyoverdine, and thus, there is room for further exploitation by *de novo* mutants that make  
100 even less. We predict this to happen under low spatial structure, and high pyoverdine  
101 investment levels. Finally, pyoverdine could also be degraded due to disuse [16], especially  
102 under conditions of high iron availability where pyoverdine is not required.

## 103 RESULTS

### 104 Characterization of the ancestral pyoverdine deficient strains

105 We first characterized the strains *pvdS\_gene* and *pvdS\_prom* for their pyoverdine production  
106 and growth dynamics (Fig. 1) before they were subjected to experimental evolution (Fig. 2).  
107 These two mutants themselves spontaneously arose and spread during a previous  
108 experimental evolution study (Granato ET, Ziegenhain C & Kümmerli R, unpublished). Their  
109 entire genomes had been re-sequenced and analyzed. Those analyses revealed that both  
110 *pvdS\_gene* and *pvdS\_prom* carried non-synonymous mutations that are directly associated  
111 with their reduced pyoverdine investment levels (Fig. 1a). Strain *pvdS\_gene* has a point  
112 mutation (G>C) in the *pvdS* gene that leads to an amino acid change (Met135Ile), and thus to  
113 a modified iron-starvation sigma factor PvdS. A modified PvdS presumably has lower affinity  
114 to the RNA-polymerase, a complex that directly controls the expression of the non-ribosomal  
115 peptide synthesis machinery required to build pyoverdine. Strain *pvdS\_prom* carries a point  
116 mutation (G>T) in the consensus sequence of the -35 element in the promoter region  
117 upstream of *pvdS*. This mutant produces a wildtype sigma factor, but the transcription rate of  
118 PvdS is likely reduced.

119  
120 Both of these mutations show strong defects in pyoverdine production and growth under iron-  
121 limited conditions (Fig. 1b+c). Pyoverdine production of the *pvdS\_gene* strain was only  $9.4 \pm$   
122  $0.1$  % (mean  $\pm$  SE) compared to the wildtype strain PAO1 (measured after 24 hours), and  
123 characterized by a low but steady production rate (Fig. 1c). While pyoverdine production was  
124 also reduced in *pvdS\_prom* ( $34.7 \pm 1.4$  % relative to the ancestral wildtype strain), the  
125 production dynamic differed from *pvdS\_gene*. The *pvdS\_prom* strain had an extended phase,  
126 where no pyoverdine is produced, followed by a phase with a considerable production rate  
127 (Fig. 1c). Both mutant strains displayed substantial growth impairments, comparable to that

128 of a constructed pyoverdine knockout (Fig. 1b). This indicates that the production of higher  
129 amounts of pyoverdine would be advantageous.

130

### 131 **Further degradation and not re-evolution of pyoverdine production prevails**

132 Following 20 days (approx. 200 generations) of experimental evolution in six different  
133 environments (2 different spatial structures x 3 different iron concentrations; Fig. 2), we  
134 screened 720 clones for their evolved levels of pyoverdine production and growth under iron  
135 limitation (Fig. 3). For each clone, we then calculated the per capita pyoverdine production  
136 (pyoverdine fluorescence divided by OD<sub>600</sub>). Under the conditions of this assay, the ancestral  
137 strains *pvdS\_gene* and *pvdS\_prom* displayed 17.4 and 28.5 % (unstructured|structured), and  
138 59.9 and 83.2 % (unstructured|structured) of the wildtype PAO1 pyoverdine production  
139 levels, respectively. Among the evolved clones, there were only very few (n = 5; 0.69%) that  
140 exhibited considerably increased pyoverdine production levels (Fig. 3), indicating that  
141 reversion to higher levels of cooperation is rare. In contrast, we found a considerable number  
142 of clones (n = 29; 4.03 %) that showed either a complete abolishment or a further substantial  
143 reduction in pyoverdine production during evolution.

144

145 There was an interaction between the genetic background and the environmental conditions  
146 under which these non- and extremely low pyoverdine-producing mutants appeared. In the  
147 *pvdS\_gene* background, they appeared exclusively under low iron conditions, and were  
148 significantly more prevalent in unstructured compared to structured environments (Fisher's  
149 exact test, p = 0.012; Table 1). Since pyoverdine is important for growth under these iron-  
150 limited conditions, yet can be exploited in unstructured environments, this pattern suggests  
151 that the non- and extremely low pyoverdine-producing clones are cheats, which spread  
152 because they exploited the little amount of pyoverdine produced by *pvdS\_gene*. In the

153 *pvdS\_prom* background, meanwhile, non- and extremely low-producers appeared almost  
 154 exclusively under high iron conditions (Fisher's exact test,  $p < 0.001$ ), but independently of the  
 155 spatial structure (Fisher's exact test,  $p = 0.78$ ; Table 1). This pattern indicates that pyoverdine  
 156 production was eroded due to disuse in iron-rich environments.

157

158 **Table 1.** Frequency of non- and low-producing strains per treatment

| ancestor                | <i>pvdS_gene</i> |     |      |              |     |      | <i>pvdS_prom</i> |     |      |              |     |      |
|-------------------------|------------------|-----|------|--------------|-----|------|------------------|-----|------|--------------|-----|------|
|                         | structured       |     |      | unstructured |     |      | structured       |     |      | unstructured |     |      |
| environment             | low              | med | high | low          | med | high | low              | med | high | low          | med | high |
| <b>iron<sup>a</sup></b> |                  |     |      |              |     |      |                  |     |      |              |     |      |
| <b>NLPs<sup>b</sup></b> | 1                | 0   | 0    | 11           | 0   | 0    | 0                | 1   | 9    | 0            | 0   | 7    |
| <b>rest<sup>c</sup></b> | 59               | 60  | 60   | 49           | 60  | 60   | 60               | 59  | 51   | 60           | 60  | 53   |

<sup>a</sup> low, medium (med) or high iron availability; see methods for details

<sup>b</sup> non- or low-producers, based on initial screening; corresponds to data shown in Fig. 3

<sup>c</sup> clones not in the NLP category

159

### 160 In-depth analysis of a subset of evolved clones confirms selection against pyoverdine

161 Since the large screen of 720 clones was based on a single replicate per clone (Fig. 3), we  
 162 subjected the 34 clones with a putatively altered pyoverdine phenotype to a replicated in-  
 163 depth phenotypic screen. We further included 23 clones with apparently unaltered  
 164 pyoverdine phenotypes. For clones with the *pvdS\_gene* background, we could confirm the  
 165 phenotype of all clones that showed a further decrease in pyoverdine production (Fig. 4a). In  
 166 fact, pyoverdine production virtually absent in all of them. Conversely, we could only confirm  
 167 the phenotype of two of the three mutants with putatively increased pyoverdine production,  
 168 and even for the confirmed ones, the observed increase was marginal (Fig. 4b). We obtained  
 169 similar confirmation patterns for clones with the *pvdS\_prom* background: confirmation rate  
 170 was only high for clones with reduced but not for those with increased pyoverdine production  
 171 levels (Fig. 4c+d). Finally, when examining the clones with a putatively unaltered pyoverdine,



172 we found that 61 % (14 out of 23) of these clones indeed had a phenotype equal to their  
173 ancestral strain, whereas 35 % (8 out of 23) of the clones had pyoverdine production slightly  
174 but significantly reduced (Fig. S1 in Additional File 1). Taken together, these results confirm  
175 the patterns of our extensive screen (Fig. 3): there was selection to further reduce pyoverdine  
176 production, but no restoration of cooperation.

177

### 178 **Evolved pyoverdine phenotypes are not based on further mutations in *pvdS***

179 We anticipated that both restoration and further reduction of pyoverdine production could  
180 be caused by additional mutations in the *pvdS* gene or its promoter. However, we found no  
181 support for this hypothesis when sequencing this genetic region for the subset of 57 clones  
182 described above (Table S1 in Additional File 1). All clones had retained the original, ancestral  
183 mutation inherited from their respective low-producing ancestor (SNP in the *pvdS* gene itself  
184 for *pvdS\_gene*, SNP in the *pvdS* promoter region for *pvdS\_prom*). Additionally, one clone from  
185 the *pvdS\_gene* line gained an additional SNP in the *pvdS* promoter region, which however did  
186 not affect its phenotype. No additional mutations were found in any of the clones, indicating  
187 that the observed changes in pyoverdine production either represent an entirely phenotypic  
188 change, or are caused by mutations in regions other than *pvdS*.

## 189 DISCUSSION

190 Numerous studies used microbial systems to address a key question in evolutionary biology:  
191 how can cooperation be maintained in the face of cheats that exploit the cooperative acts  
192 performed by others [17–19]. Conversely, the question of what happens after a cheat has  
193 become fixed in the population has received much less attention. Would it be possible that  
194 cooperation re-evolves if environmental conditions and thus selection pressures change  
195 [20,21]? To tackle this question, we performed experimental evolution with *P. aeruginosa*  
196 cheat strains (mutants that produced greatly reduced amounts of the iron-scavenging public  
197 good pyoverdine), which had the potential to revert back to a full cooperative phenotype by  
198 a single point mutation. Despite this favourable genetic predisposition, we never observed  
199 reversion to cooperation, even under conditions that had previously been identified as being  
200 favourable for cooperation. Instead, we observed the emergence of mutants that completely  
201 abolished pyoverdine production, and their frequency of appearance depended on both their  
202 genetic background and the environmental conditions. Taken together, our study highlights  
203 that the re-evolution of cooperation might be constrained in bacteria.

204

205 We can think of at least two reasons why there was no reversion from cheats back to  
206 cooperators. At the mechanistic level, it might be that the likelihood of acquiring a mutation  
207 that leads to reversion was simply too low. It is well known that mutations causing a loss of  
208 function are disproportionately more likely to occur than mutations resulting in a gain of  
209 function [22]. In the context of our experiment, re-evolution of pyoverdine production could  
210 have happened by a reversion to the ancestral PAO1 genotype (i.e. reversing the point  
211 mutation in the *pvdS* region) or by a compensatory mutation in *pvdS* or another regulatory  
212 element. Clearly, the number of mutational targets that would lead to reversion seem limited,  
213 and thus mutation supply might have been too low for revertants to arise.

214

215 At the ultimate level, it might be that we have not chosen the appropriate environmental  
216 conditions that would select for reversion. According to Hamilton's rule, we would expect  
217 selection for reverted cooperators when relatedness is relatively high and/or when the cost-  
218 to-benefit ratio of cooperation is relatively low. Although we have implemented experimental  
219 conditions promoting significant relatedness (through limited cell mixing in spatially  
220 structured environments) and reduced costs of pyoverdine production (at intermediate iron  
221 limitation), the chosen conditions were apparently not favourable enough to select for the re-  
222 evolution of cooperation. At first glance, this seems surprising because the chosen conditions  
223 have previously been shown to prevent the spreading of cheats and to maintain cooperation  
224 [8,10,23]. Our findings thus suggest that the conditions for the evolution of cooperation are  
225 more stringent than those for the maintenance of cooperation. Indeed, social evolution theory  
226 predicts cooperation to be maintained when  $rb = c$  (rare cheats cannot invade), while  
227 Hamilton's rule  $rb > c$  must be met for cooperation to evolve. The fulfilment of this latter  
228 condition might require specific conditions (e.g. very high relatedness), as reverted  
229 cooperators would have to invade from extreme rarity, while being surrounded by clones  
230 exploiting any pyoverdine molecule diffusing away from the producer.

231

232 Instead of reversion to cooperation, we observed selection for mutants that further reduced  
233 or completely abolished pyoverdine production (Fig. 3+4). Intriguingly, the environments that  
234 promoted the spread of these mutants differed between *pvdS\_gene* and *pvdS\_prom*,  
235 indicating that different selection pressures can promote the same phenotype. For the  
236 *pvdS\_gene* background, we found that the further degradation of pyoverdine production  
237 predominantly occurred with low spatial structure and under stringent iron limitation. As  
238 pyoverdine is important for growth under these conditions but widely shared due to mixing,

239 we assume that these mutants spread because they cheated on the residual pyoverdine  
240 produced by the ancestral *pvdS*\_gene. This finding confirms the notion that “cheating” is  
241 context-dependent, and shows that a strain that evolved as a cheat is still susceptible to  
242 further exploitation, despite its greatly reduced investment into a cooperative trait [24]. In  
243 contrast to this pattern, we observed the further degradation of pyoverdine production in the  
244 *pvdS*\_prom background almost exclusively in iron-rich environments regardless of spatial  
245 structure. Because pyoverdine is not needed under iron-rich conditions, yet still expressed in  
246 low amounts [11,16], we assume that selection against pyoverdine production represents the  
247 erosion of an unnecessary trait.

248

249 We can only speculate about why the genetic background seems to matter for whether  
250 pyoverdine degradation is presumably driven by cheating or disuse. One possible explanation  
251 might reside in the different pyoverdine production profiles shown by the two strains. While  
252 *pvdS*\_gene has a low but steady production rate, *pvdS*\_prom delays pyoverdine production,  
253 but then produces pyoverdine at a higher rate compared to *pvdS*\_gene. It could be that  
254 delaying the onset of pyoverdine production is a successful strategy to prevent the invasion  
255 of mutants with completely abolished pyoverdine production. With regard to trait erosion, it  
256 seems possible that *pvdS*\_prom produces higher amounts of pyoverdine compared to  
257 *pvdS*\_gene under iron-rich conditions; this would make this strain more susceptible for trait  
258 erosion because pyoverdine production is maladaptive under these conditions. Further  
259 studies are clearly needed to elucidate these pattern at both the proximate and ultimate level.  
260 The proximate level is of special interest here because the complete loss of pyoverdine  
261 production did not involve mutations in *pvdS*, which has been identified as the main target of  
262 selection for the initial reduction in pyoverdine production [7,12; Granato ET, Ziegenhain C &  
263 Kümmerli R, unpublished].

264

## 265 **CONCLUSIONS**

266 Our findings indicate that the evolution of cooperation through mutational reversion seems  
267 to be constrained. Reasons for this could be linked to the low number of mutational targets  
268 available that can lead to reversion, or the stringent selective conditions required to promote  
269 the spread of revertants. Clearly, the conditions that have previously been shown to maintain  
270 cooperation are not sufficient to promote the invasion of *de novo* re-evolved cooperators  
271 from rare. While we focussed on the re-evolution of cooperation via mutations, another  
272 alternative scenario under natural conditions is that cheats may revert to cooperators through  
273 horizontal gene transfer [25,26]. This scenario has especially been advocated for cooperative  
274 traits located on plasmids [27,28]. While this is a plausible scenario for some social traits, it is  
275 unlikely to apply to siderophores, which are typically encoded on the chromosome. The  
276 insights gained from our study contribute to our understanding of the conditions necessary  
277 for a cooperative trait to evolve in microorganisms.

## 278 **METHODS**

279 **Strains and growth conditions.** We used *Pseudomonas aeruginosa* wildtype strain PAO1  
280 (ATCC 15692) and a pyoverdine-negative mutant, both constitutively expressing GFP (PAO1-  
281 *gfp*, PAO1- $\Delta$ *pvdD-gfp*), as positive and negative controls for pyoverdine production,  
282 respectively. We further used PAO1-*pvdS\_gene* and PAO1-*pvdS\_prom*, two mutants with  
283 strongly reduced pyoverdine production, that evolved *de novo* from PAO1-*gfp* during  
284 experimental evolution in iron-limited media (2.5 gL<sup>-1</sup> BactoPeptone, 3 gL<sup>-1</sup> NaCl, 5 mgL<sup>-1</sup>  
285 Cholesterol, 25 mM MES buffer pH = 6.0, 1mM MgSO<sub>4</sub>, 1mM CaCl<sub>2</sub>, 200 μM 2,2'-Bipyridyl  
286 (Granato ET, Ziegenhain C & Kümmerli R, unpublished)). PAO1-*pvdS\_gene* carries a non-  
287 synonymous point mutation (G>C) in the *pvdS* gene that leads to an amino acid change  
288 (Met135Ile). PAO1-*pvdS\_prom* carries a point mutation (G>T) in the consensus sequence of  
289 the -35 element in the promoter region upstream of *pvdS*. Both mutants constitutively express  
290 GFP. Throughout this publication, the two mutants are referred to as “*pvdS\_gene*” and  
291 “*pvdS\_prom*”.

292  
293 For overnight pre-culturing, we used Luria Bertani (LB) medium, and incubated the bacteria  
294 under shaking conditions (190-200 rpm) for 16-18 hours. Optical density (OD) of pre-cultures  
295 was determined at a wavelength of 600 nm in a spectrophotometer. We induced strongly  
296 iron-limiting growth conditions by using casamino acids (CAA) medium (5 gL<sup>-1</sup> casamino acids;  
297 1.18 gL<sup>-1</sup> K<sub>2</sub>HPO<sub>4</sub>·3H<sub>2</sub>O; 0.25 gL<sup>-1</sup> MgSO<sub>4</sub>·7H<sub>2</sub>O) supplemented with 25 mM HEPES and 400 μM  
298 of the iron chelator 2,2'-Bipyridyl. For conditions with medium or high iron availability, we  
299 further added FeCl<sub>3</sub> at final concentrations of 1 μM or 40 μM, respectively. We manipulated  
300 the spatial structure of the environment by growing bacteria either in liquid medium under  
301 shaking conditions (180 rpm; unstructured environment) or in viscous medium containing

302 0.1% agar under static conditions (structured environment). All experiments in this study were  
303 conducted at 37°C. All chemicals were purchased from Sigma-Aldrich, Switzerland.

304

305 **Ancestral growth and pyoverdine kinetics.** To measure growth and pyoverdine production  
306 kinetics of all strains in iron-limited media prior to experimental evolution, we washed  
307 bacterial pre-cultures twice with sterile NaCl (0.85%), adjusted OD<sub>600</sub> to 1.0, and diluted 10<sup>-4</sup>  
308 into 200 µL of iron-limited CAA (Bipyridyl 400 µM) per well in a 96-well plate. The plate was  
309 then incubated in a Tecan Infinite M-200 plate reader (Tecan Group Ltd., Switzerland) for 24  
310 hours, and OD<sub>600</sub> and pyoverdine-specific fluorescence (emission 400 nm, excitation 460 nm)  
311 were measured every 15 minutes.

312

313 **Experimental evolution.** We conducted experimental evolution with *pvdS*<sub>gene</sub> and  
314 *pvdS*<sub>prom</sub> as starting points. We let each strain evolve independently under six different  
315 experimental treatments in a full-factorial design: 2 spatial structures (unstructured vs.  
316 structured) x 3 iron availabilities (low vs. medium vs. high iron availability) in three replicate  
317 independent lines (Fig. 2). At the start of the experimental evolution, overnight cultures of  
318 both clones were washed twice with NaCl (0.85%), adjusted to an OD<sub>600</sub> of 1.0 and diluted  
319 1:1000 into 200 µL of nutrient medium in 96-well plates. Plates were wrapped with parafilm,  
320 incubated for 24 hours and subsequently diluted 1:1000 in fresh nutrient medium. We  
321 repeated this cycle for 20 consecutive transfers, allowing for approximately 200 generations  
322 of bacterial evolution (Fig. 2). At the end of the experiment, we prepared freezer stocks for  
323 each evolved population (n = 36) by mixing 100 µL of bacterial culture with 100 µL of sterile  
324 glycerol (85%). Samples were stored at -80°C.

325

326 **Isolation of single clones.** To check whether evolved clones showed altered pyoverdine  
327 production levels compared to the ancestral *pvdS*\_gene and *pvdS*\_prom strains, we isolated a  
328 total of 720 evolved clones (20 per replicate and treatment). Specifically, we regrew evolved  
329 bacterial populations from freezer stocks in 5 mL LB medium for 16-18 hours (180 rpm) and  
330 subsequently adjusted them to OD<sub>600</sub> = 1.0. Then, 200 µL of 10<sup>-6</sup> and 10<sup>-7</sup> dilutions were spread  
331 on large LB agar plates (diameter 150 mm), which we incubated at 37°C for 18-20 hours. We  
332 then randomly picked twenty colonies for each of the 36 evolved populations, and  
333 immediately processed the clones for the pyoverdine measurement assay (see below).

334

335 **Screen for evolved pyoverdine production levels.** For each of the 720 evolved clones, we  
336 transferred a small amount of material from the agar plate directly into 200 µL of CAA +  
337 Bipyridyl (400 µM) in individual wells on a 96-well plate. We incubated plates with clones  
338 originating either from unstructured environments or structured environments for 24 hours  
339 under shaken (180 rpm) or static conditions, respectively. Following incubation, we measured  
340 OD<sub>600</sub> and pyoverdine-specific fluorescence (emission 400 nm, excitation 460 nm) in the Tecan  
341 Infinite M-200 plate reader as a single endpoint measurement. As controls, we included in  
342 three-fold replication on each plate: the high-producing PAO1 wildtype (positive control); the  
343 pyoverdine knockout mutant PAO1- $\Delta$ *pvdD-gfp* (negative control); the two low-producing  
344 mutants *pvdS*\_gene and *pvdS*\_prom; and blank growth medium. To preserve all tested clones  
345 for future experiments, we mixed 100 µL of bacterial culture with 100 µL of sterile glycerol  
346 (85%) for storage at -80°C.

347

348 **Confirmation of evolved pyoverdine phenotypes.** Based on the screen above, we identified  
349 34 clones with an altered pyoverdine production level (Table S1 in Additional File 1).  
350 Specifically, we found five clones that seem to have restored pyoverdine production by



351 roughly 50% (i.e. in terms of the difference between the low-producing ancestor cheat and  
352 the high-producing wildtype) and 29 clones that seem to produce less than 33% of pyoverdine  
353 compared to their ancestral pyoverdine low-producers (either *pvdS\_gene* or *pvdS\_prom*). We  
354 subjected these clones to an in-depth repeated screening of their pyoverdine phenotype. In  
355 addition, we selected two random clones per treatment (n = 24), from different evolved  
356 populations, that displayed no change in their production levels (compared to *pvdS\_gene* or  
357 *pvdS\_prom*). One clone had to be excluded due to contamination, so that the final sample size  
358 for this group of clones was n = 23. For all of these evolved clones (n = 57), we re-measured  
359 their pyoverdine production level in three-fold replication using the same protocol and  
360 controls as described above.

361

362 **Sequencing of *pvdS* promoter and coding region.** Since the ancestral low-producing strains  
363 (*pvdS\_gene* or *pvdS\_prom*) had mutations in the *pvdS* gene or its promoter, we were  
364 wondering whether the altered phenotypes observed in the evolved clones were based on  
365 reversion or additional mutations in this genetic region. To address this question, we PCR  
366 amplified and sequenced the *pvdS* gene and the upstream region containing the promoter  
367 sequence of all 57 evolved clones screened above. PCR mixtures consisted of 2 µl of a 10 µM  
368 solution of each primer, *pvdS\_fw* (5'-GACGCATGACTGCAACATT-3') and *pvdS\_rev* (5'-  
369 CCTTCGATTTTCGCCACA-3'), 25 µl Quick-Load Taq 2X Master Mix (New England Biolabs), 1 µl  
370 of DMSO, and 20 µl of sterile Milli-Q water. We added bacterial biomass from glycerol stocks  
371 to the PCR mixture distributed in 96-well PCR plates. Plates were sealed with an adhesive film.  
372 We used the following PCR conditions: denaturation at 95°C for 10 min; 30 cycles of  
373 amplification (1 min denaturation at 95°C, 1 min primer annealing at 56°C, and 1 min primer  
374 extension at 72°C); final elongation at 72 °C for 5 min. The PCR products were purified and  
375 commercially sequenced using the *pvdS\_fw* primer. While sequencing worked well for 51

376 clones, it failed for two clones, and resulted in partial sequences for six clones (Table S1 in  
377 Additional File 1).

378 **Statistical Analysis.** All statistical analyses were performed using R 3.2.2[29]. We tested for  
379 treatment differences in the frequency of non- or low-producing strains using Fisher's exact  
380 test and corrected for multiple testing using the Bonferroni correction. To compare  
381 pyoverdine production of evolved clones to that of the low-producing ancestors, we used  
382 one-way analyses of variance (ANOVA) and corrected for multiple testing using Tukey's HSD  
383 (honest significant difference) test.

384

385

### 386 **Authors' contributions**

387 EG and RK planned the experiments. EG carried out the experiments and conducted  
388 statistical analysis. EG and RK analyzed and interpreted the data, and wrote the manuscript.

389 **REFERENCES**

- 390 1. Foster KR, Bell T. Competition, not cooperation, dominates interactions among culturable  
391 microbial species. *Curr. Biol.* 2012;22:1845–50.
- 392 2. Becker J, Eisenhauer N, Scheu S, Jousset A. Increasing antagonistic interactions cause  
393 bacterial communities to collapse at high diversity. *Ecol. Lett.* 2012;15:468–74.
- 394 3. Faust K, Raes J. Microbial interactions: from networks to models. *Nat. Rev. Microbiol.*  
395 2012;10:538–50.
- 396 4. Inglis RF, Biernaskie JM, Gardner A, Kümmerli R. Presence of a loner strain maintains  
397 cooperation and diversity in well-mixed bacterial communities. *Proc. R. Soc. B Biol. Sci.*  
398 2016;283:20152682.
- 399 5. Diggie SP, Griffin AS, Campbell GS, West SA. Cooperation and conflict in quorum-sensing  
400 bacterial populations. *Nature.* 2007;450:411–4.
- 401 6. Griffin AS, West SA, Buckling A. Cooperation and competition in pathogenic bacteria.  
402 *Nature.* 2004;430:1024–7.
- 403 7. Kümmerli R, Santorelli LA, Granato ET, Dumas Z, Dobay A, Griffin AS, et al. Co-evolutionary  
404 dynamics between public good producers and cheats in the bacterium *Pseudomonas*  
405 *aeruginosa*. *J. Evol. Biol.* 2015;28:2264–74.
- 406 8. Dumas Z, Kümmerli R. Cost of cooperation rules selection for cheats in bacterial  
407 metapopulations. *J. Evol. Biol.* 2012;25:473–84.
- 408 9. Julou T, Mora T, Guillon L, Croquette V, Schalk IJ, Bensimon D, et al. Cell-cell contacts  
409 confine public goods diffusion inside *Pseudomonas aeruginosa* clonal microcolonies. *Proc.*  
410 *Natl. Acad. Sci. U. S. A.* 2013;110:12577–82.
- 411 10. Kümmerli R, Griffin AS, West SA, Buckling A, Harrison F. Viscous medium promotes  
412 cooperation in the pathogenic bacterium *Pseudomonas aeruginosa*. *Proc. Biol. Sci.*  
413 2009;276:3531–8.
- 414 11. Kümmerli R, Jiricny N, Clarke LS, West SA, Griffin AS. Phenotypic plasticity of a  
415 cooperative behaviour in bacteria. *J. Evol. Biol.* 2009;22:589–98.
- 416 12. Andersen SB, Marvig RL, Molin S, Krogh Johansen H, Griffin AS. Long-term social  
417 dynamics drive loss of function in pathogenic bacteria. *Proc. Natl. Acad. Sci.*  
418 2015;112:10756–61.
- 419 13. Visca P, Imperi F, Lamont IL. Pyoverdine siderophores: from biogenesis to biosignificance.  
420 *Trends Microbiol.* 2007;15:22–30.
- 421 14. Schalk IJ, Guillon L. Pyoverdine biosynthesis and secretion in *Pseudomonas aeruginosa*:  
422 implications for metal homeostasis. *Environ. Microbiol.* 2013;15:1661–73.
- 423 15. Hamilton WD. The genetical evolution of social behaviour. *J. Theor. Biol.* 1964;7:1–16.
- 424 16. Zhang X, Rainey PB. Exploring the Sociobiology of Pyoverdin-Producing *Pseudomonas*.  
425 *Evolution (N. Y.)*. 2013;67:3161–3174.
- 426 17. Strassmann JE, Queller DC. Evolution of cooperation and control of cheating in a social  
427 microbe. *Proc. Natl. Acad. Sci. U. S. A.* 2011;108:10855–62.
- 428 18. West SA, Griffin AS, Gardner A, Diggie SP. Social evolution theory for microorganisms.  
429 *Nat. Rev. Microbiol.* 2006;4:597–607.
- 430 19. Bruger E, Waters C. Sharing the sandbox: Evolutionary mechanisms that maintain  
431 bacterial cooperation [version 1; referees: 2 approved]. *F1000Research.* 2015;4:1504.
- 432 20. Cordero OX, Ventouras L-A, DeLong EF, Polz MF. Public good dynamics drive evolution of  
433 iron acquisition strategies in natural bacterioplankton populations. *Proc. Natl. Acad. Sci. U. S.*

- 434 A. 2012;109:20059–64.
- 435 21. Fiegna F, Yu Y-TN, Kadam S V., Velicer GJ. Evolution of an obligate social cheater to a  
436 superior cooperator. *Nature*. 2006;441:310–4.
- 437 22. Eyre-Walker A, Keightley PD. The distribution of fitness effects of new mutations. *Nat.*  
438 *Rev. Genet.* 2007;8:610–8.
- 439 23. Leinweber A, Fredrik Inglis R, Kümmerli R. Cheating fosters species co-existence in well-  
440 mixed bacterial communities. *ISME J.* 2017;11:1179–88.
- 441 24. Ghoul M, West SA, Diggle SP, Griffin AS. An experimental test of whether cheating is  
442 context dependent. *J. Evol. Biol.* 2014;27:551–6.
- 443 25. Soucy SM, Huang J, Gogarten JP. Horizontal gene transfer: building the web of life. *Nat.*  
444 *Rev. Genet.* 2015;16:472–82.
- 445 26. Cordero OX, Polz MF. Explaining microbial genomic diversity in light of evolutionary  
446 ecology. *Nat. Rev. Microbiol.* 2014;12:263–73.
- 447 27. Nogueira T, Rankin DJ, Touchon M, Taddei F, Brown SP, Rocha EPC. Horizontal Gene  
448 Transfer of the Secretome Drives the Evolution of Bacterial Cooperation and Virulence. *Curr.*  
449 *Biol.* 2009;19:1683–91.
- 450 28. Dimitriu T, Lotton C, Benard-Capelle J, Misevic D, Brown SP, Lindner AB, et al. Genetic  
451 information transfer promotes cooperation in bacteria. *Proc. Natl. Acad. Sci.*  
452 2014;111:11103–8.
- 453 29. R Development Core Team. R: A language and environment for statistical computing.  
454 Vienna, Austria: R Foundation for Statistical Computing; 2016.
- 455

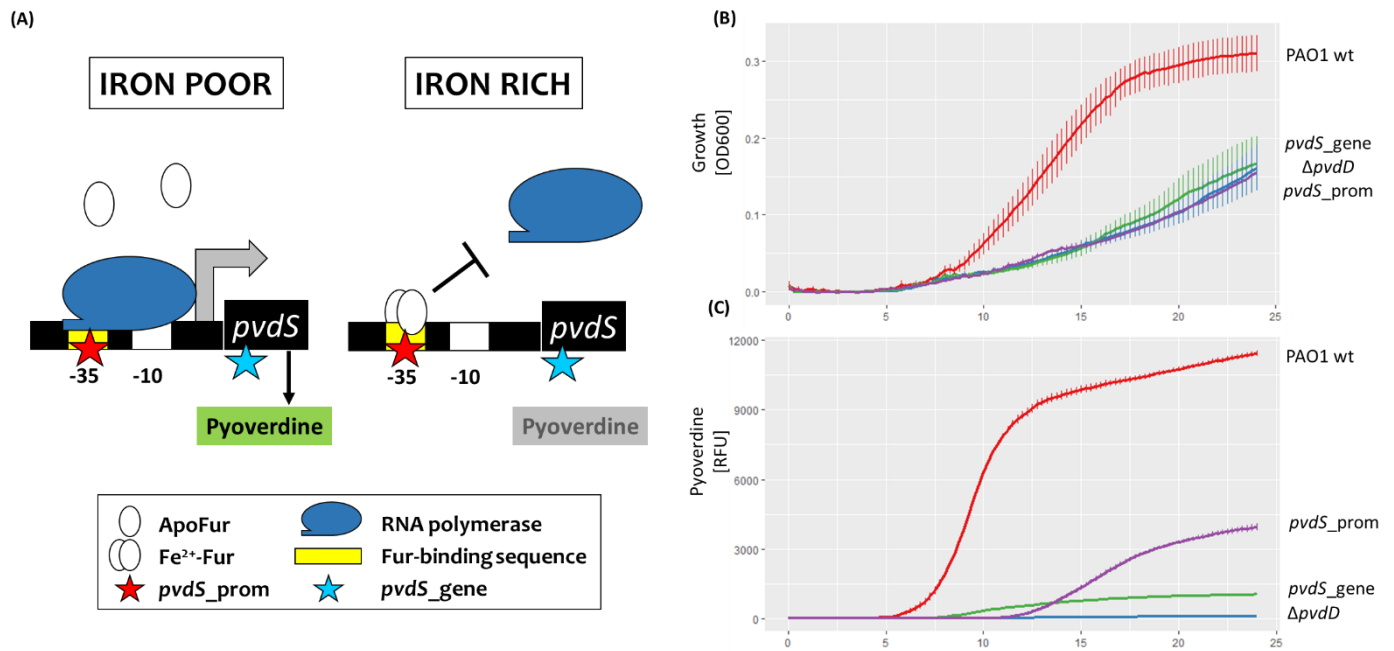

**Fig. 1. Evolved clones of *P. aeruginosa* show impaired growth and pyoverdine production.**

**(A)** Schematic representation of *pvdS* regulation under iron-poor and iron-rich conditions. When iron is limited, *pvdS* is transcribed and upregulates pyoverdine biosynthesis. When iron levels in the cytoplasm are sufficient, Fur (ferric-uptake regulator) builds a complex with Fe<sup>2+</sup>, which then binds to the *pvdS*-promoter site and inhibits transcription. Stars indicate SNPs in the mutant strains *pvdS\_prom* (red) and *pvdS\_gene* (blue). **(B+C)** A *P. aeruginosa* wildtype strain (PAO1 wt) and three different mutants with deficient pyoverdine production were grown in iron-limited media at 37 °C for 24 hours. Y axis shows **(B)** optical density measured at 600 nm or **(C)** pyoverdine-specific fluorescence (emission|excitation 400 nm|460 nm). X axis shows time in hours.  $\Delta pvdD$ : engineered knock-out mutant carrying an in-frame deletion of *pvdD*, encoding a part of the pyoverdine synthesis pathway. *pvdS\_gene*: evolved mutant with single point mutation in *pvdS*, encoding the iron-starvation sigma factor PvdS. *pvdS\_prom*: evolved mutant with a single point mutation in the promoter region of *pvdS*. Graph depicts means and standard errors based on four independent replicates per strain.

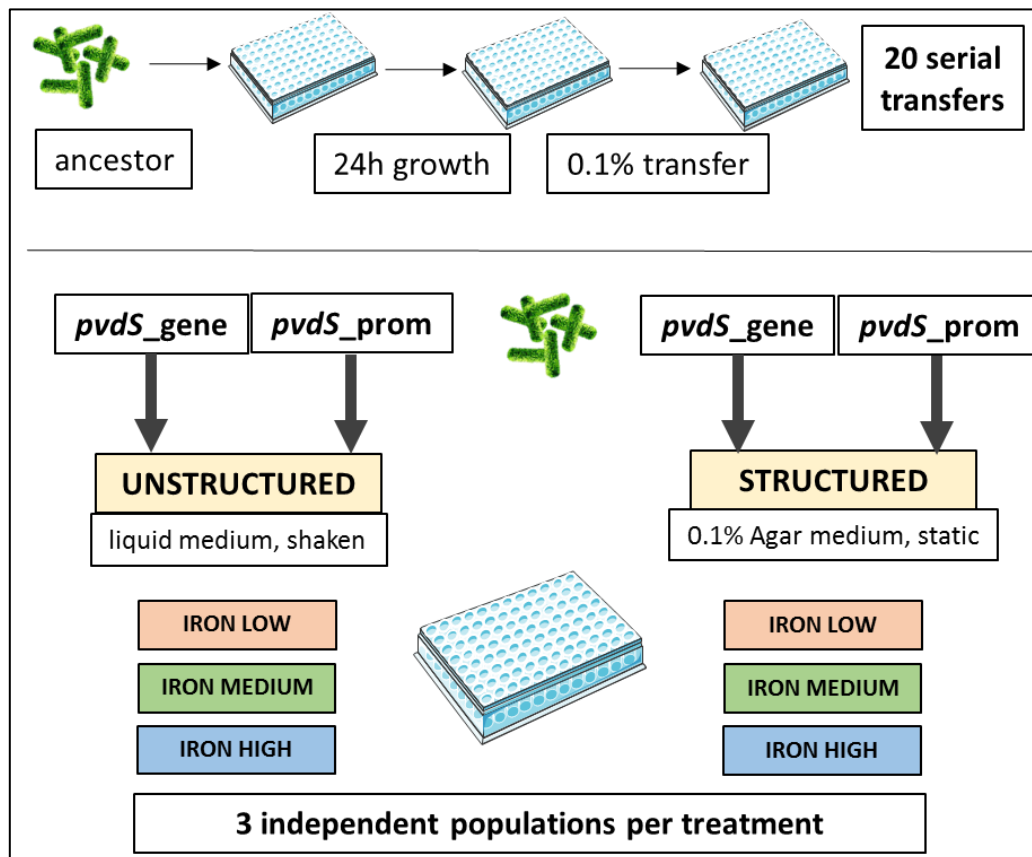

**Fig. 2. Experimental evolution setup.** Two mutant strains deficient in pyoverdine production, *pvdS\_gene* and *pvdS\_prom*, were allowed to evolve independently from each other and under different conditions. *pvdS\_gene* carries a single point mutation in *pvdS*, encoding the iron-starvation sigma factor PvdS, while *pvdS\_prom* carries a single point mutation in the promoter region of *pvdS*. The six environments used for experimental evolution differed both in their level of spatial structure (unstructured | structured) and in their iron content (“iron low”: iron chelator only; “iron medium”: iron chelator + 1  $\mu\text{M}$   $\text{FeCl}_3$ ; “iron high”: iron chelator + 40  $\mu\text{M}$   $\text{FeCl}_3$ ). Each ancestral strain was serially transferred in each of the six media in threefold replication, resulting in a total number of 36 independently evolved populations. Image sources: Servier Medical Art (multiwell plate); depositphotos.com (bacteria).

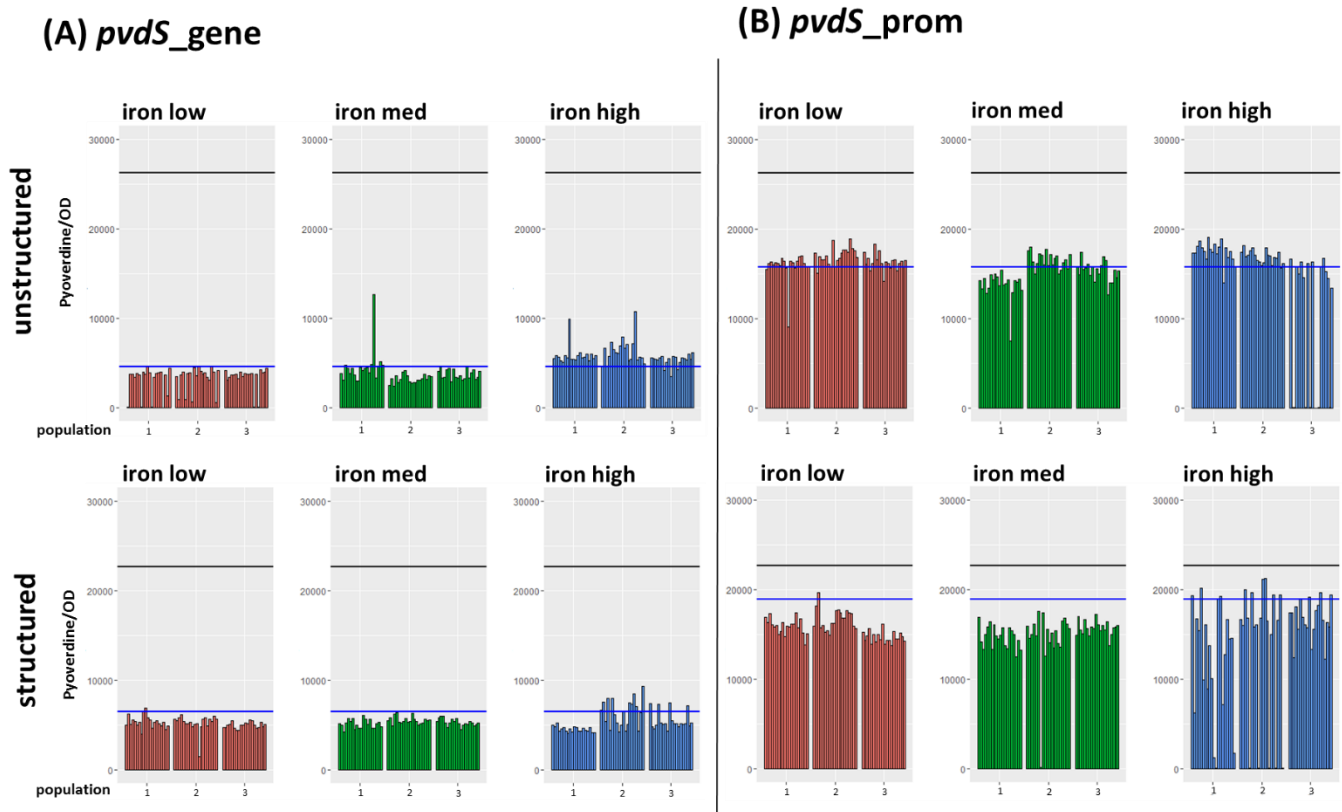

**Fig. 3. Changes in pyoverdine production after experimental evolution in different environments.** Two mutants with abnormal pyoverdine production were allowed to evolve in different media, and pyoverdine production under iron-limitation was subsequently measured in 1200 evolved clones. Environments differed in their level of spatial structure (structured|unstructured) and in their iron content (“iron low”: iron chelator only; “iron med”: iron chelator + 1  $\mu\text{M}$   $\text{FeCl}_3$ ; “iron high”: iron chelator + 40  $\mu\text{M}$   $\text{FeCl}_3$ ). **(A)** Clones evolved from the low-producer *pvdS*\_gene, a mutant with a single point mutation in *pvdS*, encoding the iron-starvation sigma factor PvdS. **(B)** Clones evolved from the low-producer *pvdS*\_prom, a mutant with a single point mutation in the promoter region of *pvdS*. Y axes show pyoverdine-specific fluorescence divided by growth (optical density at 600 nm) after 24 h of incubation. X axes show independent replicate populations the clones evolved in. Each bar represents a single measurement per evolved clone. The black line denotes the average wildtype production level in the same assay, while the blue line denotes the average production level of the respective low-producing ancestor.

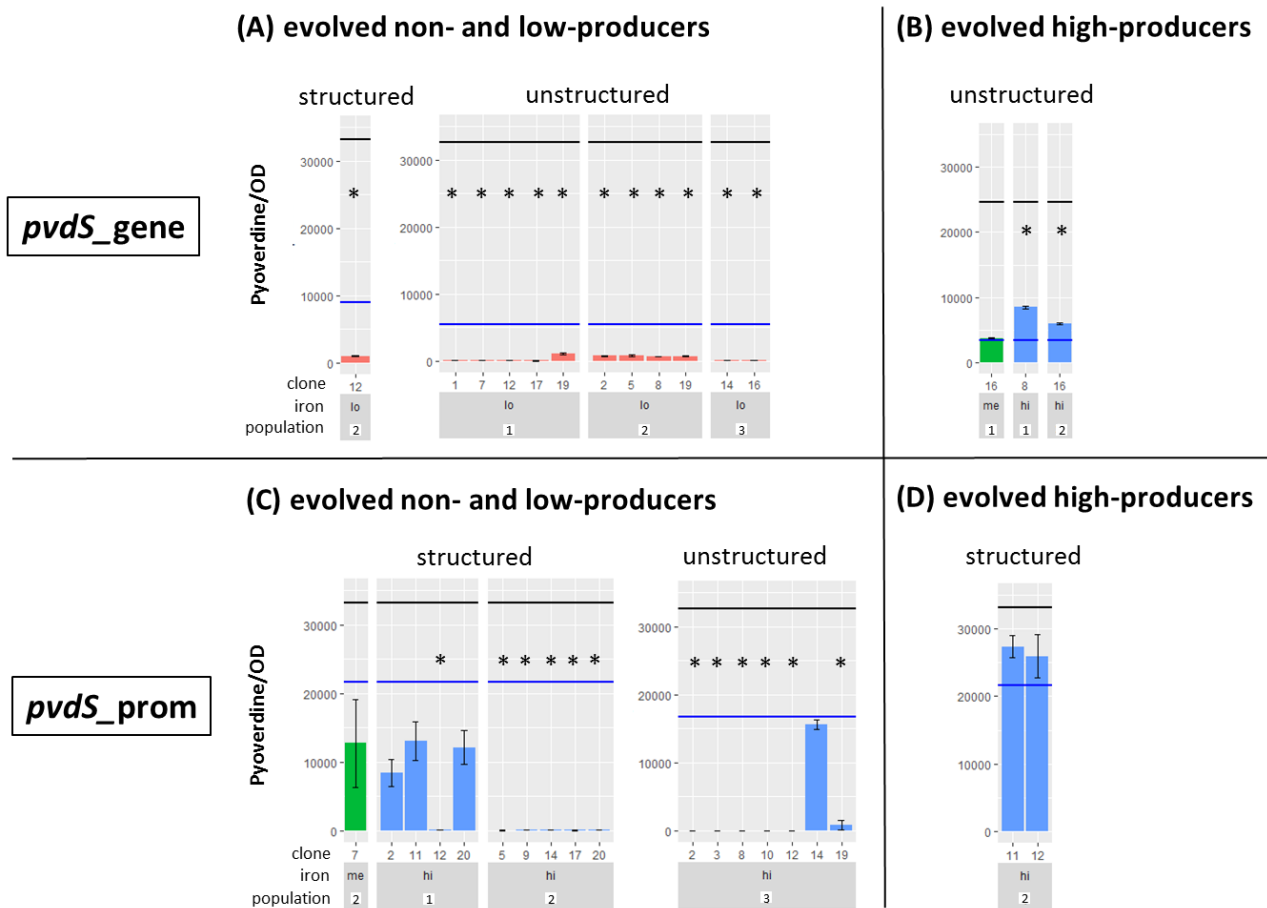

**Fig. 4. Confirmed pyoverdine phenotypes in selected clones.** Evolved clones with changes in pyoverdine production were re-tested to confirm their phenotype. Pyoverdine production was measured in iron-limited media. **(A)** Clones evolved from the low-producer *pvdS\_gene* with low production levels in initial screening. **(B)** Clones evolved from the low-producer *pvdS\_gene* with high production levels in initial screening. **(C)** Clones evolved from the low-producer *pvdS\_prom* with low production levels in initial screening. **(D)** Clones evolved from the low-producer *pvdS\_prom* with high production levels in initial screening. Y axes show pyoverdine-specific fluorescence divided by growth (optical density at 600 nm) after 24 h of incubation. X axes show independent replicate populations the clones evolved in and iron availability during experimental evolution. Bars represent mean values of three replicates per evolved clone. Error bars denote standard error of the mean. The black line represents the average wildtype production level in the same assay, while the blue line denotes the average production level of the respective low-producing ancestor. Bars are coloured by iron availability during evolution: red = low iron; green = medium iron; blue = high iron. We used one-way ANOVAs with Tukey's post-hoc test for comparisons relative to the low-producing ancestor. Asterisks indicate a significant difference ( $p < 0.05$ ) from the low-producing ancestor.



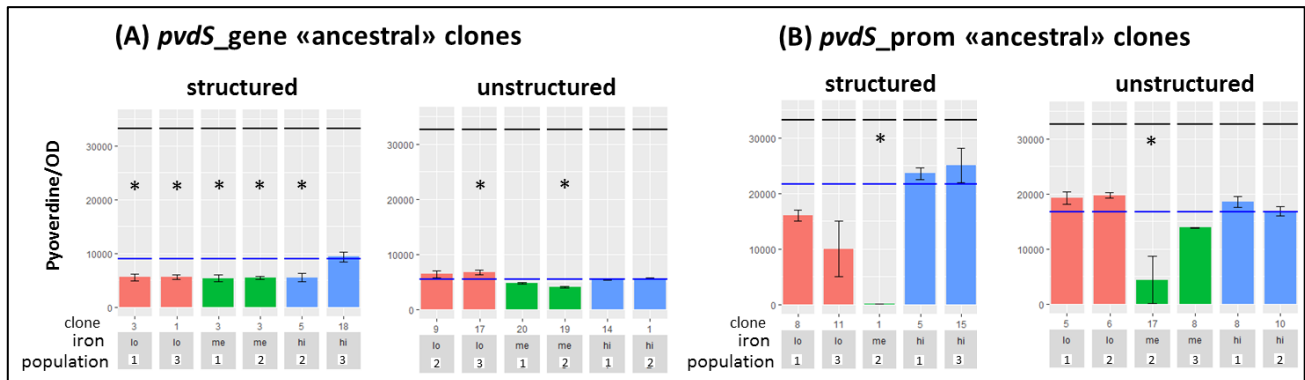

**Fig. S1. Confirmed pyoverdine phenotypes in selected clones.** Evolved clones with ancestral pyoverdine production levels were re-tested to confirm their phenotype. Pyoverdine production was measured in iron-limited media. **(A)** Clones evolved from the low-producer *pvdS\_gene*. **(B)** Clones evolved from the low-producer *pvdS\_prom*. Y axes show pyoverdine-specific fluorescence divided by growth (optical density at 600 nm) after 24 h of incubation. X axes show independent replicate populations the clones evolved in and iron availability during experimental evolution. Bars represent mean values of three replicates per evolved clone. Error bars denote standard error of the mean. The black line represents the average wildtype production level in the same assay, while the blue line denotes the average production level of the respective low-producing ancestor. Bars are coloured by iron availability during evolution: red = low iron; green = medium iron; blue = high iron. We used one-way ANOVAs with Tukey's post-hoc test for comparisons relative to the low-producing ancestor. Asterisks indicate a significant difference ( $p < 0.05$ ) from the ancestor.

**Table S1. Clones selected for in-depth analysis and sequencing**

| Population <sup>1</sup> | clone # | pyoverdine phenotype <sup>2</sup> | <i>pvdS</i> mutation <sup>3</sup> | sequence length [bp] <sup>4</sup> | <i>pvdS</i> status <sup>5</sup> | comment <sup>6</sup>              |
|-------------------------|---------|-----------------------------------|-----------------------------------|-----------------------------------|---------------------------------|-----------------------------------|
| 78_s_hi_2               | 5       | ancestral                         | 2722579 G>C                       | 778                               | ancestral                       |                                   |
| 78_s_hi_3               | 18      | ancestral                         | 2722579 G>C;<br>2722596 A-->C     | 778                               | mutated                         | additional SNP in promoter region |
| 78_s_lo_1               | 3       | ancestral                         | 2722579 G->C                      | 778                               | ancestral                       |                                   |
| 78_s_lo_2               | 12      | low                               | 2722579 G>C                       | 778                               | ancestral                       |                                   |
| 78_s_lo_3               | 1       | ancestral                         | 2722579 G>C                       | 778                               | ancestral                       |                                   |
| 78_s_me_1               | 3       | ancestral                         | 2722579 G>C                       | 778                               | ancestral                       |                                   |
| 78_s_me_2               | 3       | ancestral                         | 2722579 G>C                       | 778                               | ancestral                       |                                   |
| 78_u_hi_1               | 14      | ancestral                         | 2722579 G>C                       | 778                               | ancestral                       |                                   |
| 78_u_hi_1               | 8       | high                              | 2722579 G>C                       | 778                               | ancestral                       |                                   |
| 78_u_hi_2               | 1       | ancestral                         | 2722579 G>C                       | 778                               | ancestral                       |                                   |
| 78_u_hi_2               | 16      | high                              | 2722579 G>C                       | 778                               | ancestral                       |                                   |
| 78_u_lo_1               | 1       | low                               | 2722579 G>C                       | 778                               | ancestral                       |                                   |
| 78_u_lo_1               | 7       | low                               | 2722579 G>C                       | 778                               | ancestral                       |                                   |
| 78_u_lo_1               | 12      | low                               | 2722579 G>C                       | 778                               | ancestral                       |                                   |
| 78_u_lo_1               | 17      | low                               | 2722579 G>C                       | 778                               | ancestral                       |                                   |
| 78_u_lo_1               | 19      | low                               | 2722579 G>C                       | 778                               | ancestral                       |                                   |
| 78_u_lo_2               | 2       | low                               | 2722579 G>C                       | 778                               | ancestral                       |                                   |
| 78_u_lo_2               | 5       | low                               | N/A                               | N/A                               | N/A                             | sequencing failed                 |
| 78_u_lo_2               | 8       | low                               | 2722579 G>C                       | 778                               | ancestral                       |                                   |
| 78_u_lo_2               | 19      | low                               | 2722579 G>C                       | 778                               | ancestral                       |                                   |
| 78_u_lo_2               | 9       | ancestral                         | 2722579 G>C                       | 778                               | ancestral                       |                                   |
| 78_u_lo_3               | 14      | low                               | 2722579 G>C                       | 778                               | ancestral                       |                                   |
| 78_u_lo_3               | 16      | low                               | 2722579 G>C                       | 778                               | ancestral                       |                                   |
| 78_u_lo_3               | 17      | ancestral                         | 2722579 G>C                       | 778                               | ancestral                       |                                   |
| 78_u_me_1               | 20      | ancestral                         | 2722579 G>C                       | 778                               | ancestral                       |                                   |
| 78_u_me_1               | 16      | high                              | 2722579 G>C                       | 778                               | ancestral                       |                                   |
| 78_u_me_2               | 19      | ancestral                         | 2722579 G>C                       | 778                               | ancestral                       |                                   |
| 97_s_hi_1               | 2       | low                               | 2722079 G>T                       | 778                               | ancestral                       |                                   |
| 97_s_hi_1               | 11      | low                               | 2722079 G>T                       | 778                               | ancestral                       |                                   |
| 97_s_hi_1               | 12      | low                               | 2722079 G>T                       | 778                               | ancestral                       |                                   |
| 97_s_hi_1               | 20      | low                               | 2722079 G>T                       | 778                               | ancestral                       |                                   |
| 97_s_hi_1               | 5       | ancestral                         | 2722079 G>T                       | 778                               | ancestral                       |                                   |
| 97_s_hi_2               | 11      | high                              | 2722079 G>T                       | 778                               | ancestral                       |                                   |
| 97_s_hi_2               | 12      | high                              | 2722079 G>T                       | 778                               | ancestral                       |                                   |
| 97_s_hi_2               | 5       | low                               | 2722079 G>T                       | 778                               | ancestral                       |                                   |
| 97_s_hi_2               | 9       | low                               | 2722079 G>T                       | 778                               | ancestral                       |                                   |
| 97_s_hi_2               | 14      | low                               | 2722079 G>T                       | 778                               | ancestral                       |                                   |
| 97_s_hi_2               | 17      | low                               | 2722079 G>T                       | 628                               | ancestral                       | incomplete sequence (-150 bp)     |
| 97_s_hi_2               | 20      | low                               | 2722079 G>T                       | 778                               | ancestral                       |                                   |
| 97_s_hi_3               | 15      | ancestral                         | 2722079 G>T                       | 778                               | ancestral                       |                                   |
| 97_s_lo_1               | 8       | ancestral                         | 2722079 G>T                       | 778                               | ancestral                       |                                   |
| 97_s_lo_3               | 11      | ancestral                         | 2722079 G>T                       | 778                               | ancestral                       |                                   |

|           |    |           |             |     |           |                               |
|-----------|----|-----------|-------------|-----|-----------|-------------------------------|
| 97_s_me_2 | 7  | low       | 2722079 G>T | 778 | ancestral |                               |
| 97_s_me_2 | 1  | ancestral | 2722079 G>T | 778 | ancestral |                               |
| 97_u_hi_1 | 8  | ancestral | 2722079 G>T | 778 | ancestral |                               |
| 97_u_hi_2 | 10 | ancestral | 2722079 G>T | 683 | ancestral | incomplete sequence (-95 bp)  |
| 97_u_hi_3 | 2  | low       | 2722079 G>T | 778 | ancestral |                               |
| 97_u_hi_3 | 3  | low       | 2722079 G>T | 778 | ancestral |                               |
| 97_u_hi_3 | 8  | low       | 2722079 G>T | 642 | ancestral | incomplete sequence (-136 bp) |
| 97_u_hi_3 | 10 | low       | 2722079 G>T | 639 | ancestral | incomplete sequence (-139 bp) |
| 97_u_hi_3 | 12 | low       | 2722079 G>T | 639 | ancestral | incomplete sequence (-136 bp) |
| 97_u_hi_3 | 14 | low       | 2722079 G>T | 778 | ancestral |                               |
| 97_u_hi_3 | 19 | low       | 2722079 G>T | 778 | ancestral |                               |
| 97_u_lo_1 | 5  | ancestral | 2722079 G>T | 628 | ancestral | incomplete sequence (-150 bp) |
| 97_u_lo_2 | 6  | ancestral | 2722079 G>T | 778 | ancestral |                               |
| 97_u_me_2 | 17 | ancestral | N/A         | N/A | N/A       | sequencing failed             |
| 97_u_me_3 | 8  | ancestral | 2722079 G>T | 778 | ancestral |                               |

<sup>1</sup> 78 = *pvdS*\_gene, 97 = *pvdS*\_prom; s = structured; u = unstructured; lo = iron low; me = iron medium; hi = iron high

<sup>2</sup> pyoverdine phenotype compared to the low-producing ancestor in 1<sup>st</sup> screen (Fig. 3)

<sup>3</sup> genome location in PAO1 reference genome (*pseudomonas.com*) and respective change in nucleotide

<sup>4</sup> length of sequenced promoter region and *pvdS* gene; full sequence length = 778 bp (only *pvdS* gene: 564 bp)

<sup>5</sup> "ancestral": clone harbors only the mutation already present in the low-producing ancestor

"mutated": clone harbors mutation in addition to the one already present in the low-producing ancestor

<sup>6</sup> in case of incomplete sequencing, numbers in brackets indicate number of base pairs missing from the end of the *pvdS* gene
